# Supplementary material for: Tissue microenvironment dictates the fate and tumor-suppressive function of type 3 ILCs
Source: PubMed Central journal article supplement — J Exp Med. 2017 Aug 7;214(8):2331–47. doi: 10.1084/jem.20162031 (PMC5551572; doi:10.1084/jem.20162031), 2017-08-07
Supplement: JEM_20162031_sm.pdf [file JEM_20162031_sm.pdf]

SUPPLEMENTAL MATERIAL

Nussbaum et al., <https://doi.org/10.1084/jem.20162031>

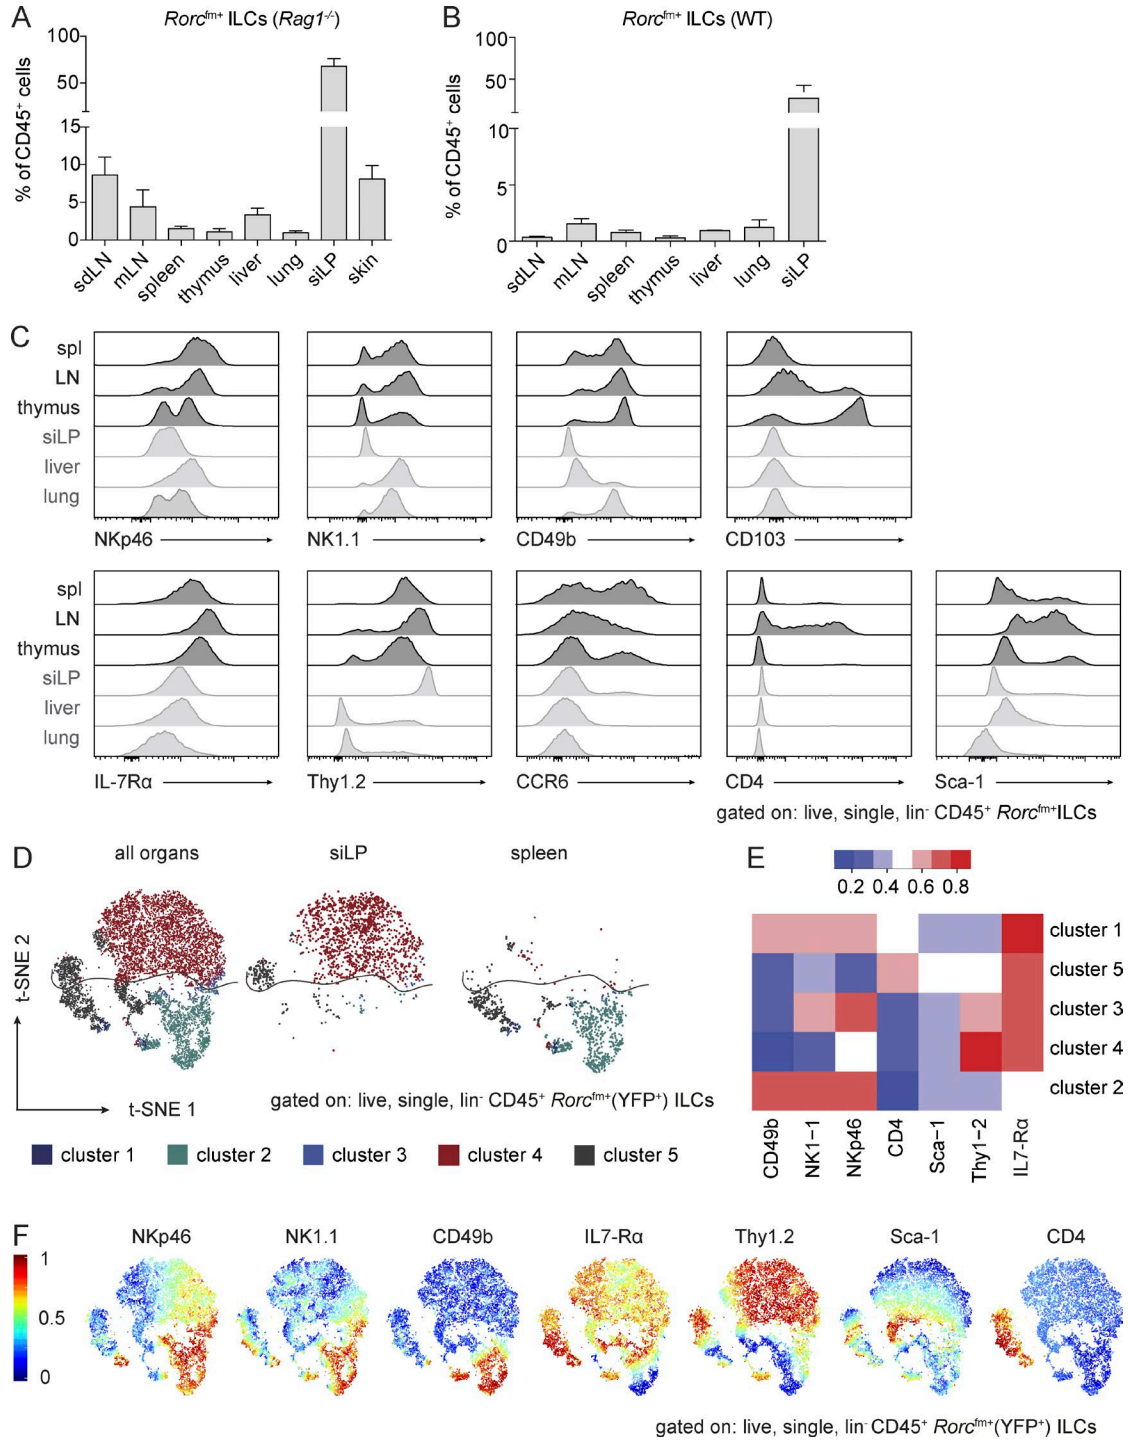

Figure S1. ***Rorc<sup>fm</sup>* ILCs from various organs possess different expression pattern.** (A) Frequencies of *Rorc<sup>fm</sup>* ILCs within the CD45 compartment of various organs of *Rorc<sup>fm</sup>-Rag1<sup>-/-</sup>* mice. Graphs represent pooled data from two independent experiments,  $n \geq 4$  each (means  $\pm$  SEM). (B) Frequencies of *Rorc<sup>fm</sup>* ILCs of within the CD45 compartment of various organs of *Rorc<sup>fm</sup>* (WT) mice. Graphs represent pooled data from two independent experiments,  $n \geq 4$  each (means  $\pm$  SEM). (C) Histograms of lymphoid (dark) splenic (spl), LN, thymic, and nonlymphoid (light) siLP, liver, or lung *Rorc<sup>fm</sup>* ILCs. Representative histograms of two independent experiments,  $n \geq 5$  each. (D) Dimensionality reduction using t-SNE. Data from *Rorc<sup>fm</sup>* ILCs of spleen and siLP (of *Rorc<sup>fm</sup>* [WT]) mice; gated on live, single lin<sup>-</sup>CD45<sup>+</sup> *Rorc<sup>fm</sup>* ILCs, which were transformed and plotted in two t-SNE dimensions using R software. Clustering was performed using the flowSOM algorithm ( $k = 5$ ). Depicted are the combined spleen and siLP data sets (left), the siLP dataset only (middle), and spleen dataset only (right). (E) ILC3- and NK cell-associated markers plotted in a heat map across flowSOM clusters from D. (F) Expression pattern of ILC3- and NK cell-associated markers depicted in the two t-SNE dimensions.

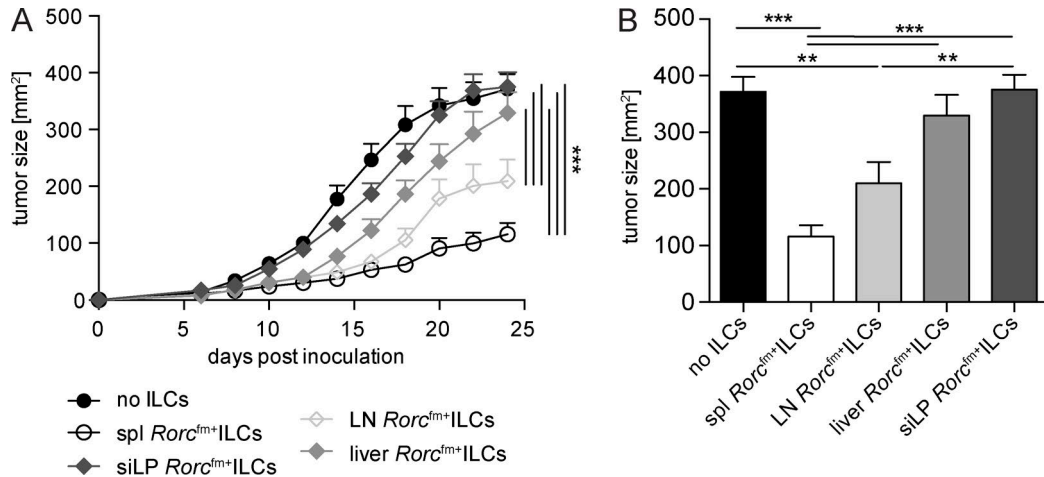

Figure S2. **Lymphoid *Rorc*<sup>f<sup>m</sup></sup> ILCs suppress tumor growth, whereas nonlymphoid *Rorc*<sup>f<sup>m</sup></sup> ILCs fail to do so.** *Il12rb2*<sup>-/-</sup> mice were s.c. challenged with B16-IL-12 coinjected with splenic (spl)-, LN-, siLP-, or liver-derived *Rorc*<sup>f<sup>m</sup></sup> ILCs or no ILCs. (A) Tumor growth of B16-IL-12 tumor cells coinjected with splenic (spl) *Rorc*<sup>f<sup>m</sup></sup> ILCs (open circles), siLP-derived *Rorc*<sup>f<sup>m</sup></sup> ILCs (dark gray squares), LN-derived *Rorc*<sup>f<sup>m</sup></sup> ILCs (gray open squares), hepatic (liver) *Rorc*<sup>f<sup>m</sup></sup> ILCs (light gray squares), or the absence of ILCs (closed circles) over time. For comparison of the tumor growth curve two-way ANOVA with Tukey's multiple comparisons test was used. \*\*\*, *P* < 0.001. (B) Quantification of tumor burden 24 d after tumor inoculation. Graph represents pooled data from three independent experiments, *n* ≥ 5 each (means ± SEM). One-way ANOVA with Tukey's multiple comparisons test was performed. \*, *P* < 0.05; \*\*, *P* < 0.01; \*\*\*, *P* < 0.001.

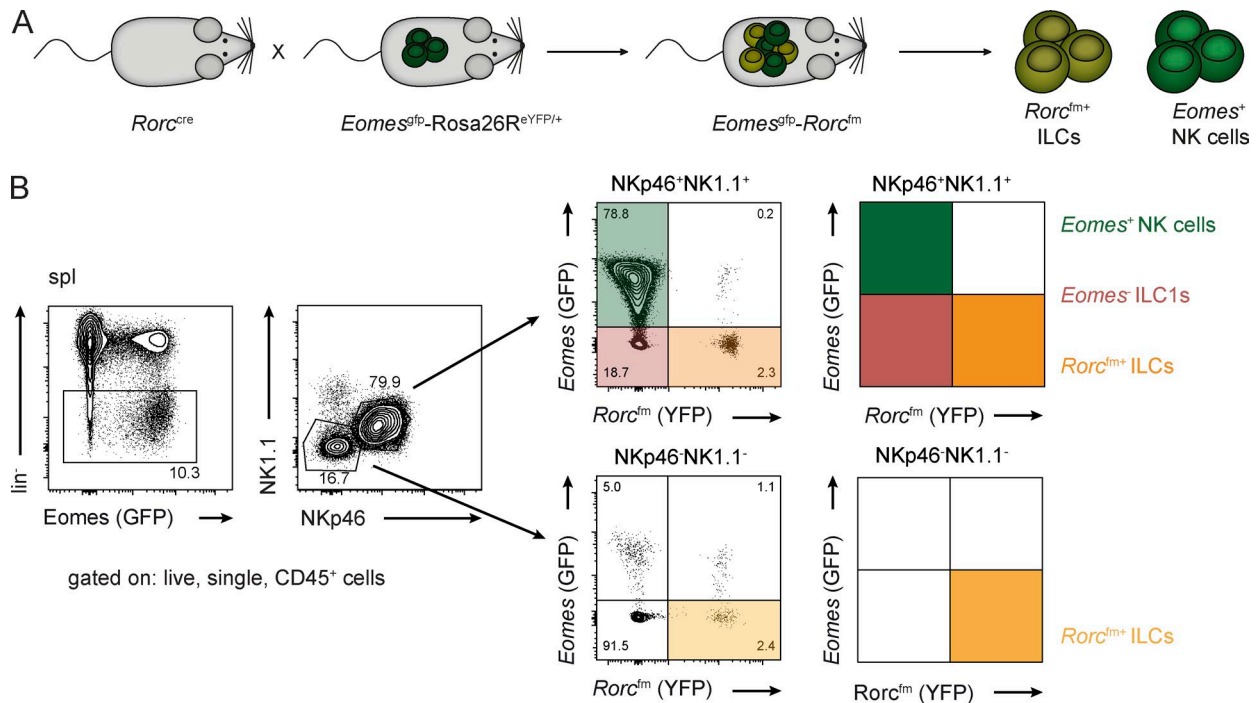

Figure S3. ***Rorc*-fate map crossed to *Eomes*-reporter mice allow identification of type 1 and type 3 ILC subsets.** (A) Schematic representation of the *Rorc*<sup>cre</sup> mice crossed to the *Eomes*<sup>GFP-Rosa26R<sup>eYFP/+</sup> mice, labeling all cells expressing RORγt with YFP and all cells expressing *Eomes* with GFP. (B) Gating strategy to identify ILC3s derived from the *Rorc* lineage (*Rorc*<sup>f<sup>m</sup></sup> ILCs), *Eomes*-expressing NK cells, and *Rorc*<sup>f<sup>m</sup></sup>*Eomes*<sup>-</sup> ILC1s in the spleen (spl). For exclusion of the adaptive immune cells and myeloid cells *lin*<sup>-</sup> (CD3<sup>-</sup>CD5<sup>-</sup>CD11c<sup>-</sup>CD19<sup>-</sup>GR-1<sup>-</sup>), live, single CD45<sup>+</sup> cells were gated. ILC1s, NK cells, and NCR<sup>+</sup> ILC3s were identified within the NCR<sup>+</sup> (NK1.1<sup>+</sup>NKp46<sup>+</sup>) cell population, whereas NCR<sup>-</sup> ILC3s were identified in the NCR<sup>-</sup> population. NCR<sup>+</sup> and NCR<sup>-</sup> ILC3s are summarized as *Rorc*<sup>f<sup>m</sup></sup> ILCs.</sup>

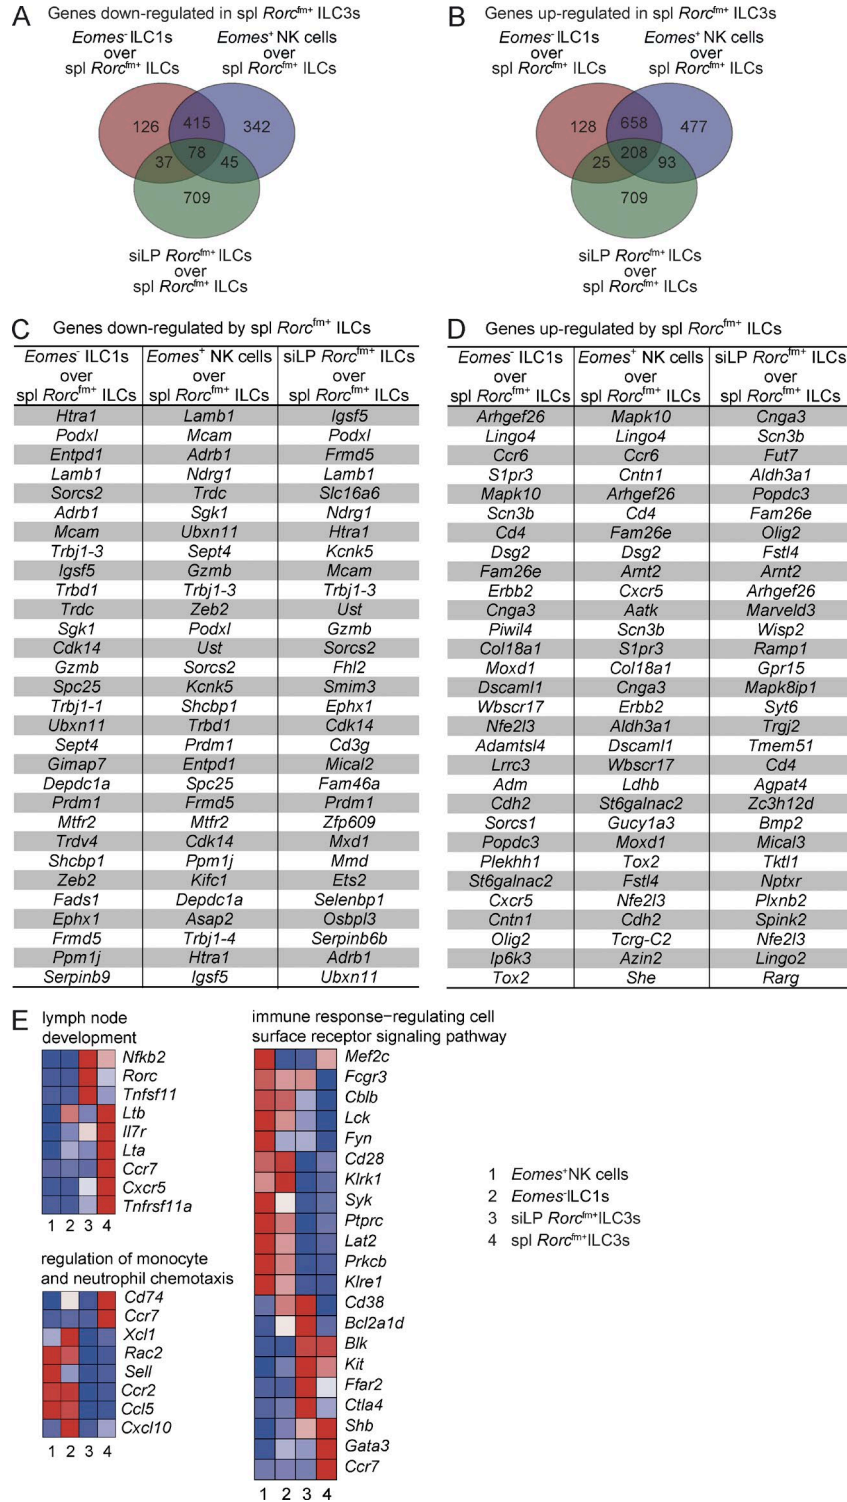

Figure S4. NGS reveals differentially expressed genes by splenic *Rorc*<sup>fl/fl</sup> ILCs compared with other ILC subsets. (A and B) Pairwise comparison of the four experimental groups depicted in a Venn diagram. 78 genes are significantly down-regulated, and 208 are up-regulated when comparing all conditions (*Eomes*<sup>+</sup> NK cells, *Eomes*<sup>+</sup> ILC1s, and siLP *Rorc*<sup>fl/fl</sup> ILCs) to splenic (spl) *Rorc*<sup>fl/fl</sup> ILCs (altered to a minimum significance threshold of  $P < 0.01$  and fold change  $> 1$  or  $-1$ ). (C) Top 30 list of genes down-regulated by splenic (spl) *Rorc*<sup>fl/fl</sup> ILCs compared with *Eomes*<sup>+</sup> NK cells, *Eomes*<sup>+</sup> ILC1s, and siLP *Rorc*<sup>fl/fl</sup> ILCs. (D) Top 30 list of genes up-regulated by splenic (spl) *Rorc*<sup>fl/fl</sup> ILCs compared with *Eomes*<sup>+</sup> NK cells, *Eomes*<sup>+</sup> ILC1s, and siLP *Rorc*<sup>fl/fl</sup> ILCs. (E) Heat maps of differentially expressed genes clustered to the indicated category. Heat maps show representative data of one sample per group.

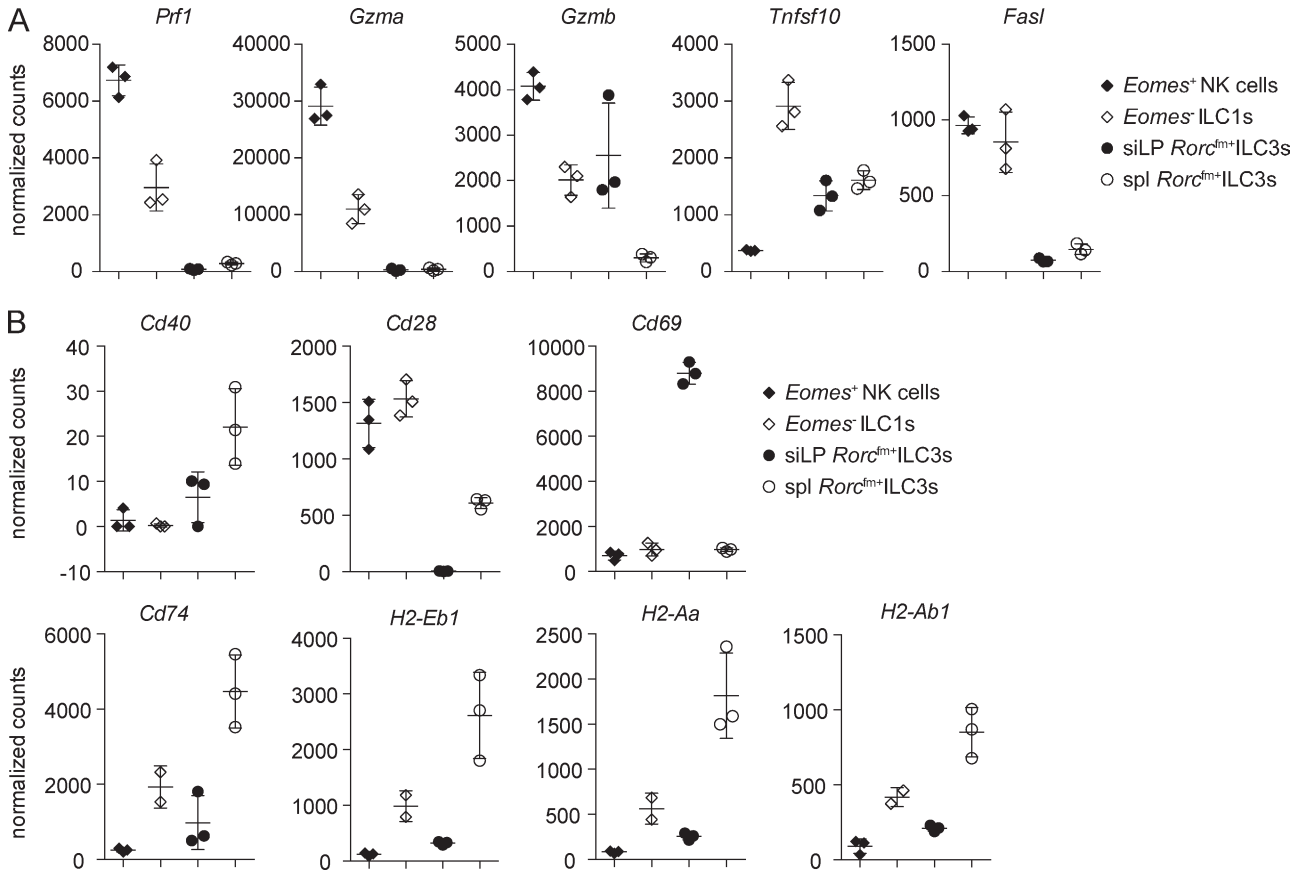

Figure S5. **Splenic *Rorc*<sup>+</sup> ILCs only express low amounts of cytotoxic molecules and an activated phenotype.** (A) Expression pattern of cytotoxic molecules by the different splenic and siLP *Rorc*<sup>+</sup> ILC data from NGS (means  $\pm$  SD; Fig. 6). (B) Expression pattern of activation markers by the different splenic and siLP *Rorc*<sup>+</sup> ILCs; data from NGS (means  $\pm$  SD; Fig. 6).
